# Supplementary material for: Variations in river input of iron impact sedimentary phosphorusburial in an oligotrophic Baltic Sea estuary
Source: Copernicus journal article supplement (doi:10.5194/bg-2018-327), 2018-08-06
Supplement: Supplementary file 1 [file bg-2018-327-supplement.pdf]

# 1 Supplements

## 1.1 Detailed model description

The reactions in the reactive transport model describe organic matter degradation coupled to different electron acceptors. Reactions are divided in primary redox reactions and other biogeochemical reactions (Table S.6). The succession of oxidants during organic matter degradation (Froelich et al., 1979) is described by means of Monod kinetics (Table S.2; Boudreau (1997)). This means that the oxidants with the highest metabolic free energy yield are preferentially used until they become limiting and the oxidant with the next highest energy yield is used (Berg et al., 2003; Boudreau, 1996a; Wang and Van Cappellen, 1996). Respiratory reactions occur where  $O_2$ ,  $NO_3^-$ ,  $Mn(OH)_2$ ,  $Fe(OH)_3$  and  $SO_4^{2-}$  serve as electron acceptors and finally organic matter is subject to methanogenesis (Reed et al. (2011a, b); Rooze et al. (2016); Table S.2). Organic matter includes carbon (C), nitrogen (N) and P in a C:N:P ratio of 106:16:0.35. In the model, oxidation of  $CH_4$  is possible with  $O_2$ ,  $Mn(OH)_2$ ,  $Fe(OH)_3$  and  $SO_4^{2-}$ . Dissolved inorganic carbon in the model is calculated as the sum of the carbon in  $CO_2$  and  $HCO_3^{2-}$ , which is produced or consumed by modeled reactions (Table S.6).

The generic mass conservation equations for solids and solutes are described by Eq. 1 and 2;

$$(1 - \phi) \frac{\partial C_s}{\partial t} = -(1 - \phi)v \frac{\partial C_s}{\partial z} + \sum R_s \quad (1)$$

$$15 \quad \phi \frac{\partial C_{aq}}{\partial t} = \phi D' \frac{\partial^2 C_{aq}}{\partial z^2} - \phi u \frac{\partial C_{aq}}{\partial z} + \sum R_{aq} \quad (2)$$

$$D' = \frac{D_m}{1 - \ln \phi^2} \quad (3)$$

where  $C_s$  is the concentration of solid species ( $\text{mol L}^{-1}$ ),  $C_{aq}$  is the concentration of dissolved species ( $\text{mol L}^{-1}$ ),  $t$  is time (yr),  $\phi$  is the sediment porosity,  $v$  and  $u$  are the advective velocities of solid and dissolved species ( $\text{cm yr}^{-1}$ ), respectively. Variables  $v$  and  $u$  were described by a depth-dependent function to account for changes in porosity (Meysman et al., 2005). Distance from the sediment-water interface is  $z$  (cm),  $D'$  the diffusion coefficient of dissolved species ( $\text{cm}^2 \text{yr}^{-1}$ ), corrected for tortuosity in the porous medium ((Boudreau, 1996b), Eq. 3).  $\sum R_s$  and  $\sum R_{aq}$  are the net reaction rates from the chemical reaction (Table S.2) for solid and dissolved species.

Porosity ( $\phi$ ) is described by Eq. 4 to account for sediment compaction (Meysman et al., 2005; Reed et al., 2011b),

$$\phi(x) = \phi_\infty + (\phi_0 - \phi_\infty) e^{-\frac{x}{y}} \quad (4)$$

where  $\phi_0$  is the porosity at the sediment-water interface,  $\phi_\infty$  is the porosity at depth and  $y$  is the porosity attenuation factor/e-folding distance (Fig. S.3A, Table S.3). The model code was written in R with the use of the marelac geochemical dataset package (Soetaert et al., 2010). To calculate the transport in porous media, the R package Reactran was used (Soetaert and Meysman, 2012). The set of ordinary differential equations was solved numerically with the Lsode integrator algorithm (Petzold, 1983).

Zero gradient boundary conditions were applied to the base of the model domain for all chemical species. To avoid influence of the boundary conditions at the base of the model domain results, the total depth of the model was set to 90 cm (divided into 900 grid cells of 0.1 cm).

Reaction parameters were mostly taken from literature or obtained within existing parameter ranges (Table S.7). If these were not available, or no fit to the data could be obtained with existing ranges, parameters were constrained by fitting the model to the measured data.

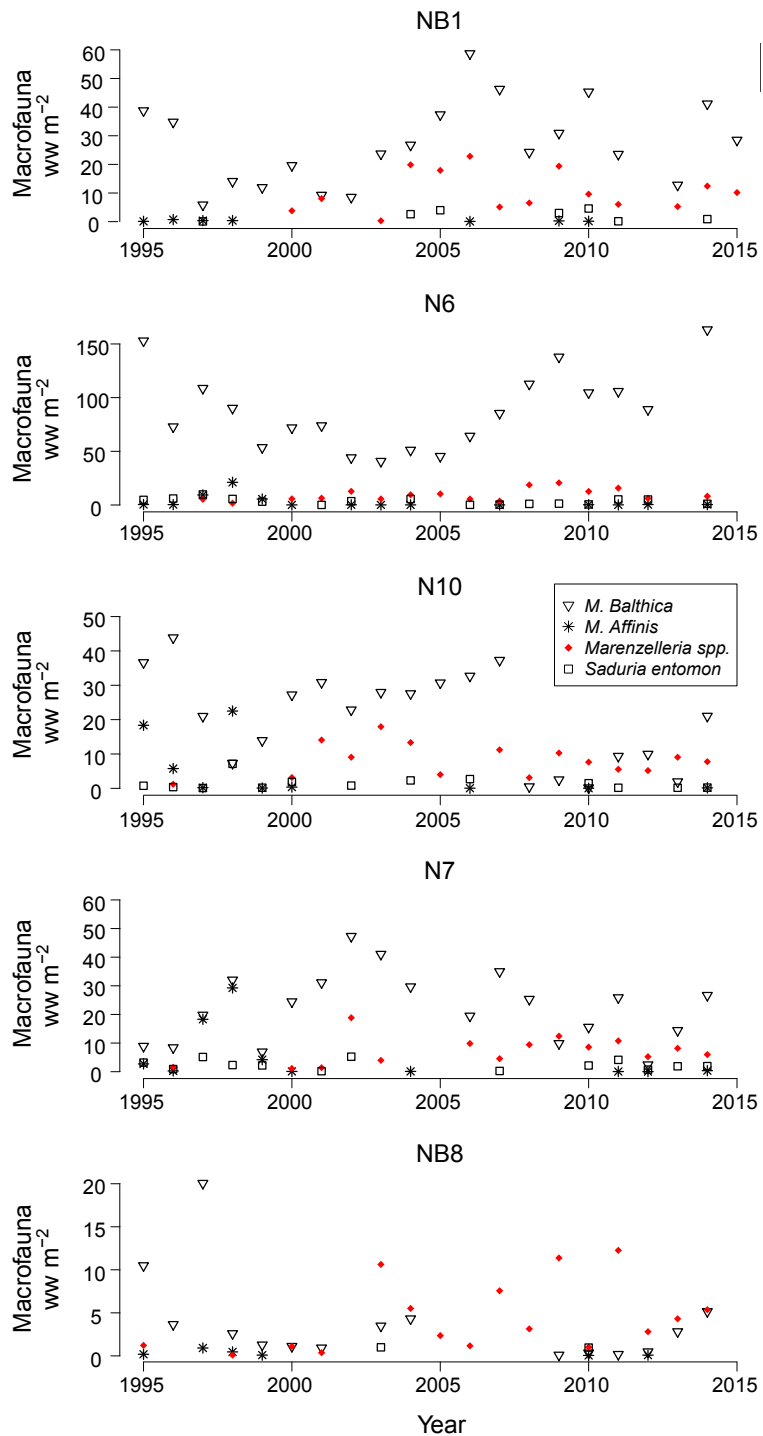

**Figure S.1.** Wet weight of macrofauna ( $\text{ww m}^{-2}$ ; in grams) at sites NB1, N6, N10, N7 and NB8 in the Öre Estuary from 1995-2015 ([www.SMHI.se](http://www.SMHI.se)).

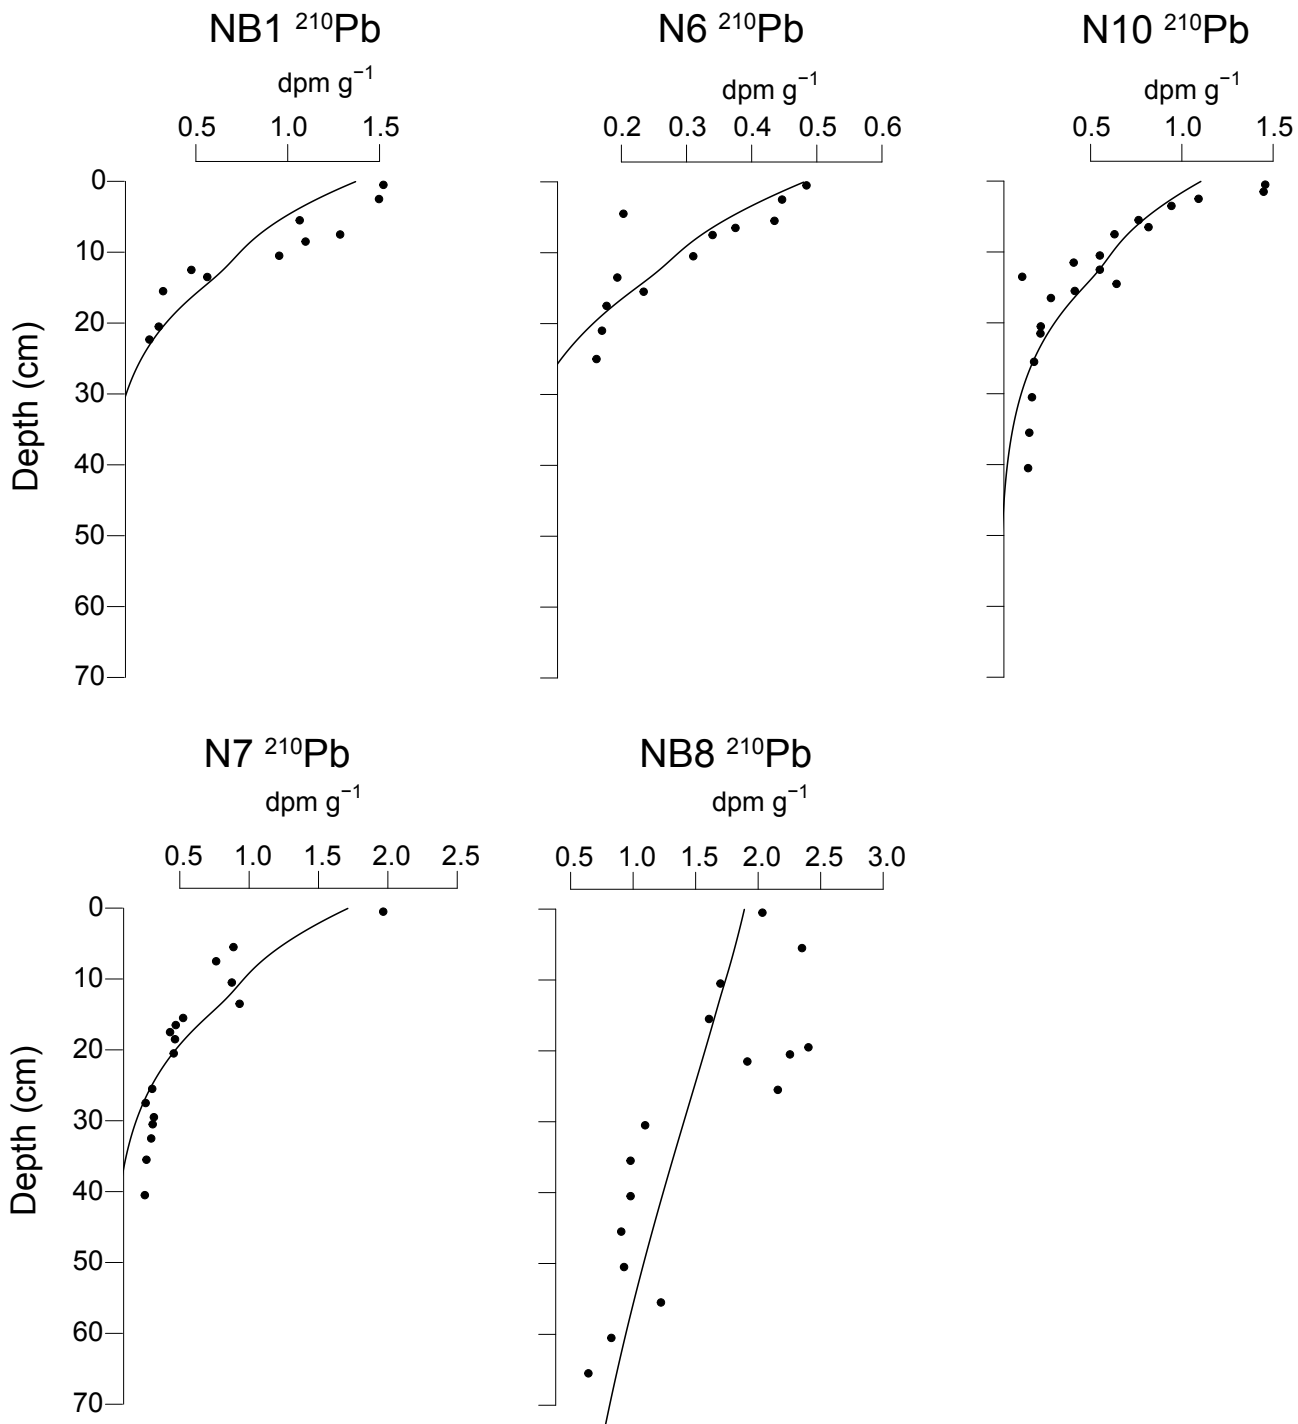

**Figure S.2.** Solid phase depth profiles of <sup>210</sup>Pb at sites NB1, N6, N10, N7 and NB8 and model fits (black lines). Sites NB1, N6, N10 and N7 were sampled in April 2015. Site NB8 was sampled in August 2015.

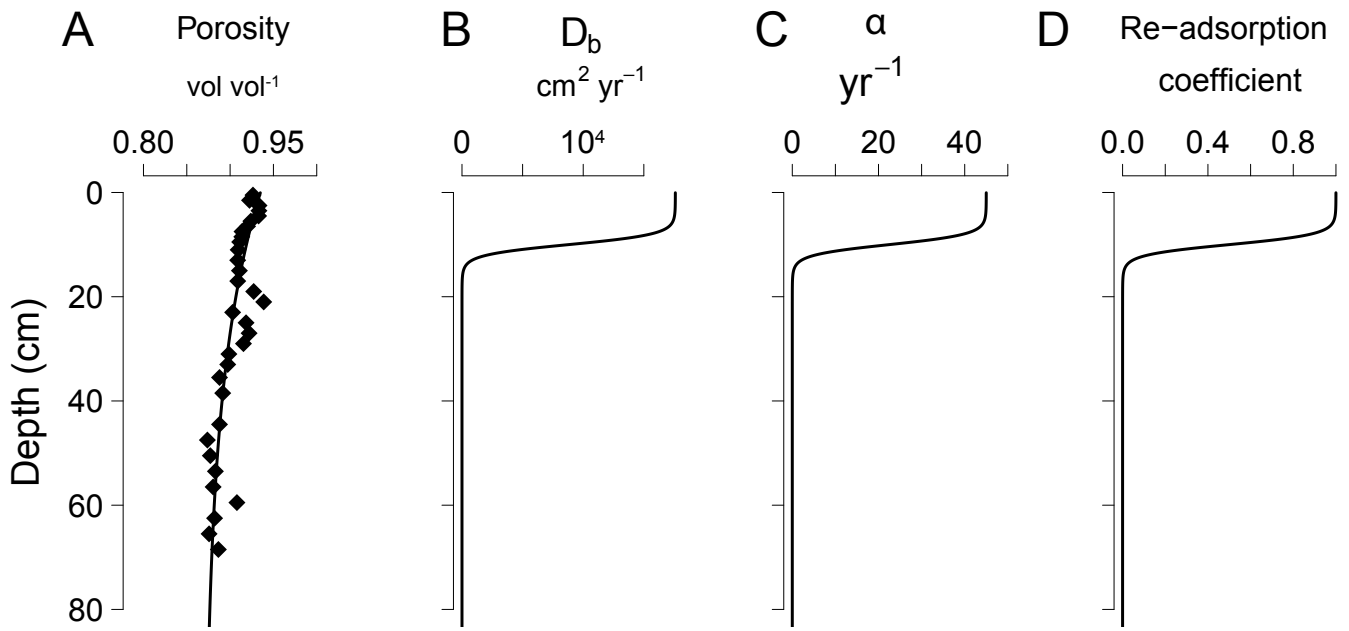

**Figure S.3.** Depth profiles used in the model A: Measured porosity (vol vol<sup>-1</sup>) for April 2015 (black circles) and fitted porosity (black line); B: bioturbation coefficient ( $D_b$ ; cm yr<sup>-1</sup>); C: bioirrigation coefficient ( $\alpha$ ; yr<sup>-1</sup>); D: Re-adsorption coefficient for HPO<sub>4</sub><sup>2-</sup>.

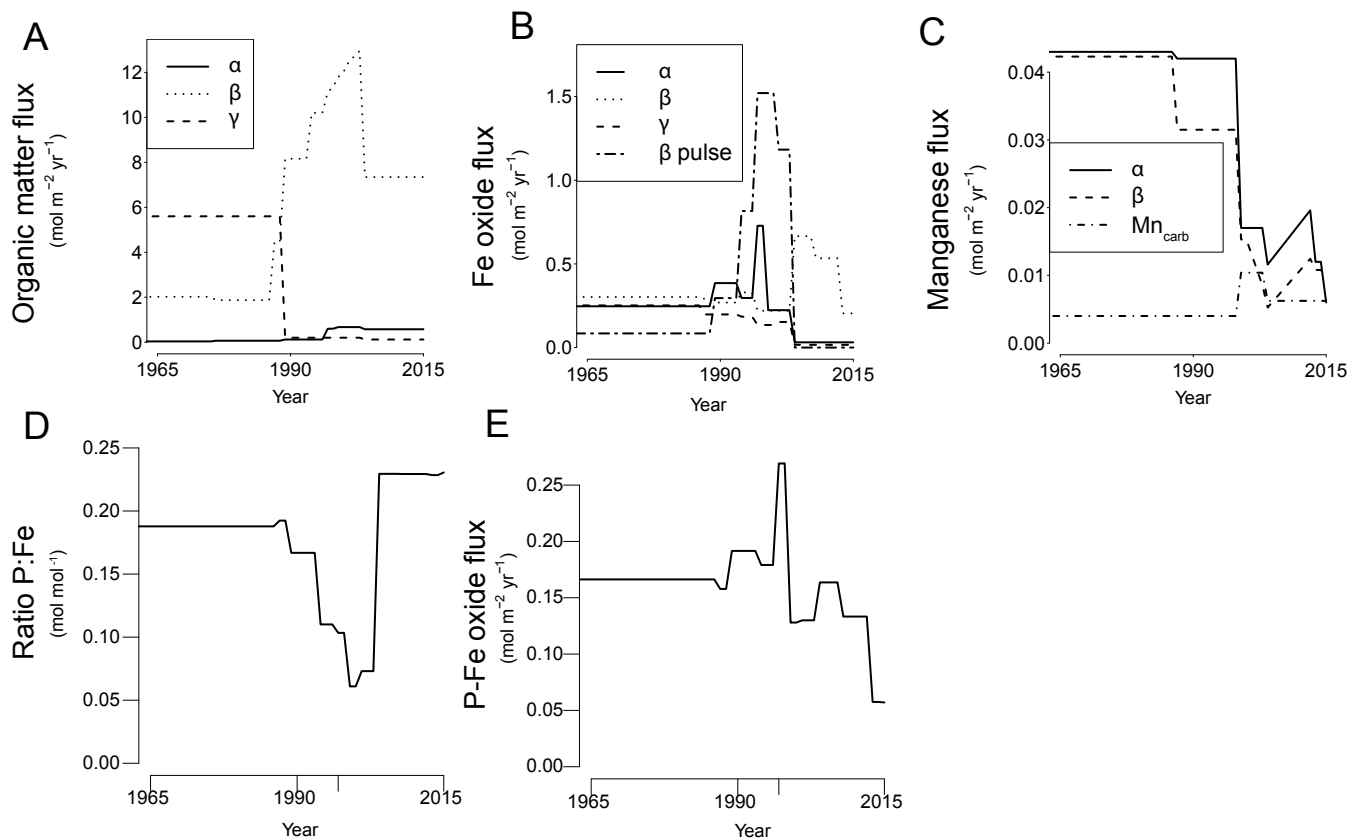

**Figure S.4.** Transient scenarios used in the reactive transport model between 1965 and 2015; A: different phases of organic matter; B different phases of Fe oxides; C: different phases of manganese; D: average P:Fe ratio of all Fe oxide fractions combined, E: total P input bound to Fe oxides. The various types of organic matter, Fe oxides and Mn oxides are indicated as  $\alpha$  (highly reactive),  $\beta$  (less reactive) and  $\gamma$  (refractory).

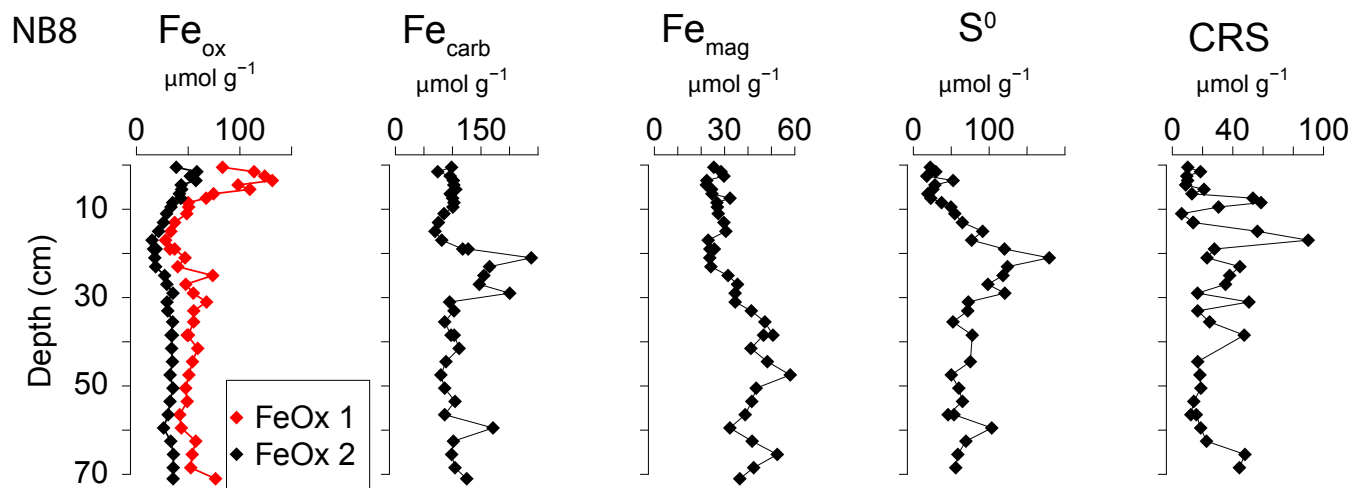

**Figure S.5.** Solid phase depth profiles of the sum of easily reducible Fe oxides and reducible (crystalline) Fe oxides (FeOx = FeOx1 + FeOx2), Fe carbonates (Fe<sub>carb</sub>), magnetite (Fe<sub>mag</sub>), elemental S (S<sup>0</sup>) and S in pyrite (CRS) for site NB8 in April 2015.

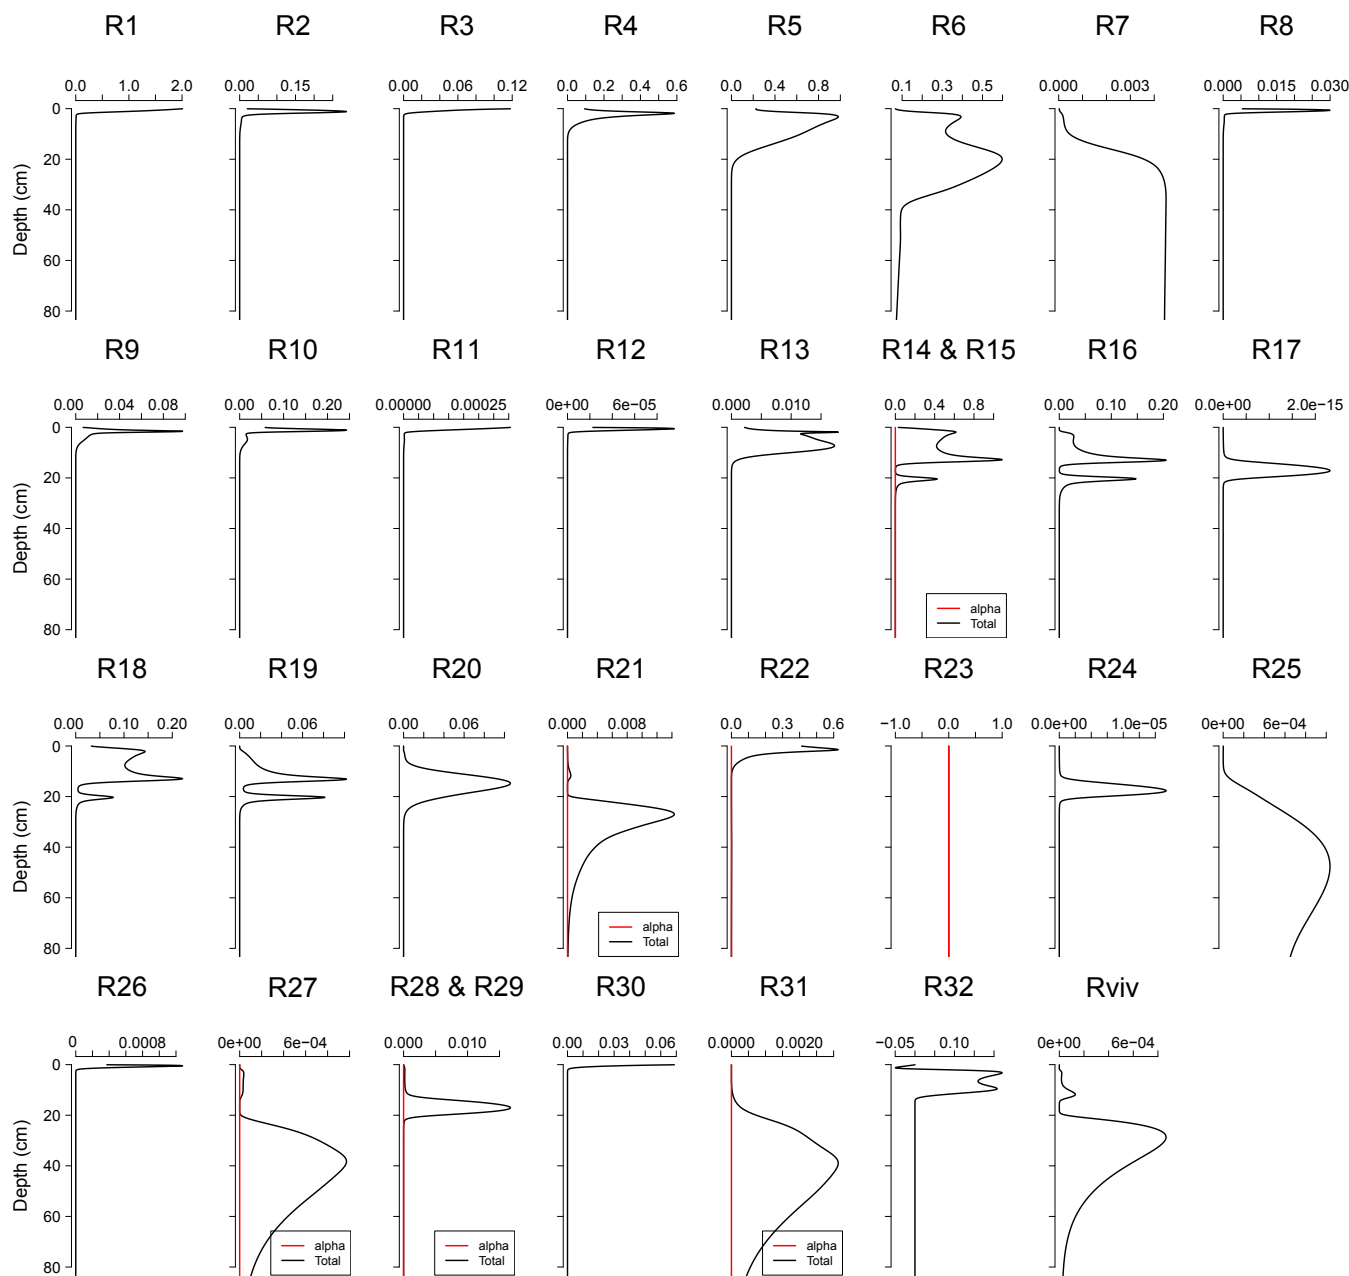

**Figure S.6.** Depth profiles of reaction rates calculated for the baseline scenario in 2015. Rates are in  $\text{mol m}^{-3} \text{yr}^{-1}$ . Reactions are described in Table S.6.

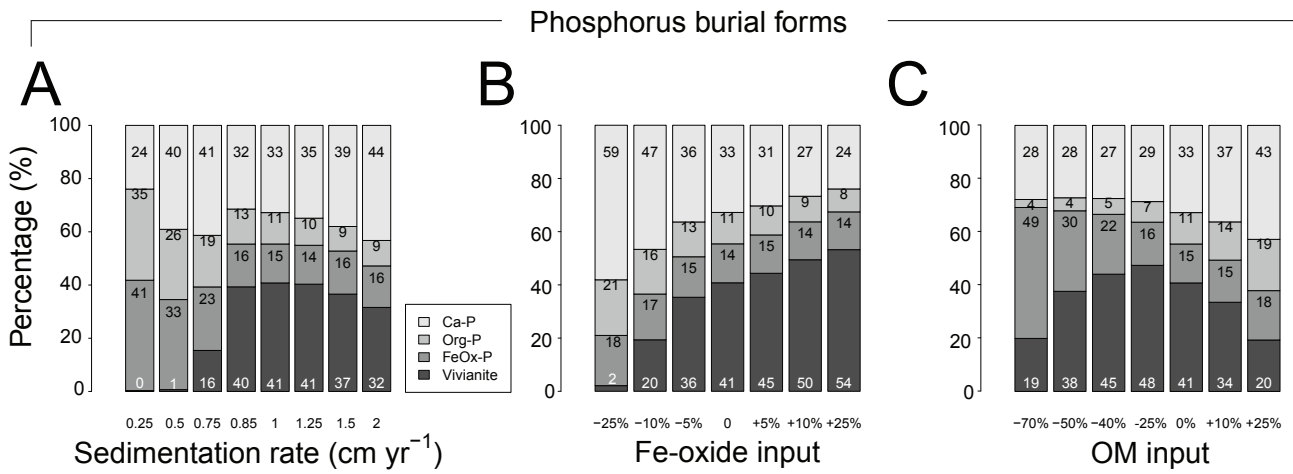

**Figure S.7.** Modeled burial forms of P as a function of changes in A: sedimentation rates between 0.25 and 2 cm yr<sup>-1</sup>; B: organic matter inputs ranging between -70% and +25% C: inputs of Fe oxides ranging between -25% and 25%. Corresponding P burial rates are shown in figure 9.

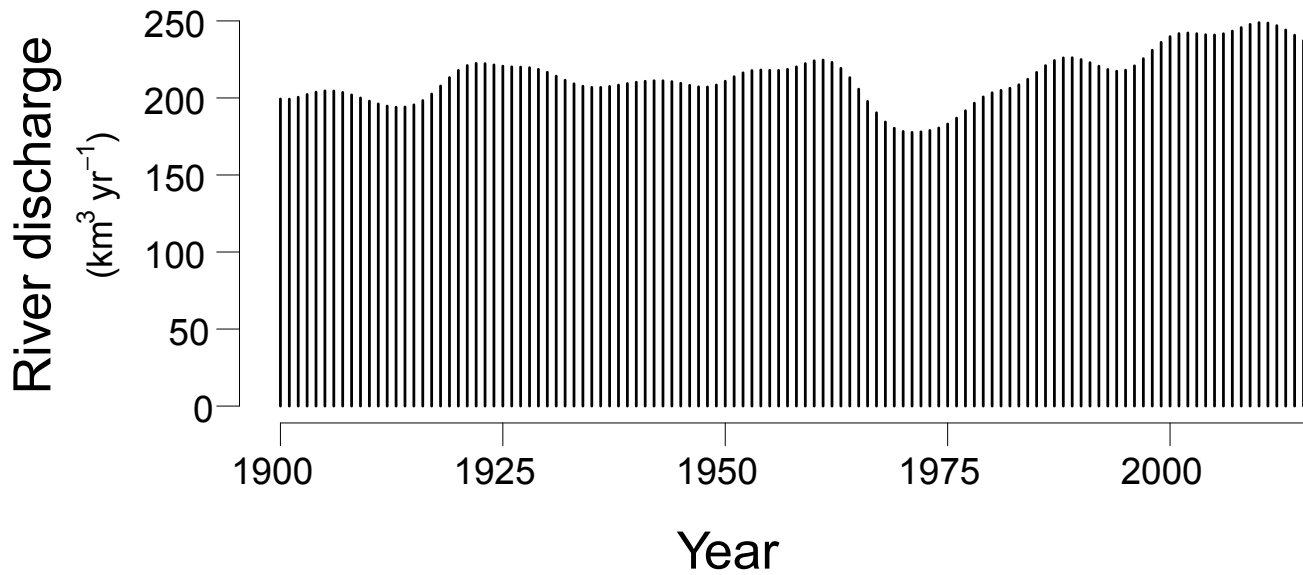

**Figure S.8.** Averaged summer river discharge for 86 Swedish rivers from 1900-2015 (www.SMHI.se).



**Table S.1.** Chemical species included in the model.

| Species                       | Notation                                                  |
|-------------------------------|-----------------------------------------------------------|
| Solid                         |                                                           |
| Organic matter <sup>a</sup>   | OM <sup><math>\alpha, \beta, \gamma</math></sup>          |
| Iron oxide <sup>a</sup>       | Fe(OH) <sub>3</sub> <sup><math>\alpha, \beta</math></sup> |
| Elemental sulfur              | S <sup>0</sup>                                            |
| Iron monosulfide              | FeS                                                       |
| Pyrite                        | FeS <sub>2</sub>                                          |
| Iron-bound Phosphorus         | Fe(OH) <sub>3</sub> P                                     |
| Vivianite                     | Fe <sub>3</sub> (PO <sub>4</sub> ) <sub>2</sub>           |
| Siderite                      | FeCO <sub>3</sub>                                         |
| Organic phosphorus            | P <sub>org</sub>                                          |
| Authigenic (Ca) phosphorus    | CaP                                                       |
| Detrital phosphorus           | DetrP                                                     |
| Manganese oxide <sup>b</sup>  | Mn(OH) <sub>2</sub> <sup><math>\alpha, \beta</math></sup> |
| Manganese carbonate           | MnCO <sub>3</sub>                                         |
| Solute                        |                                                           |
| Chloride                      | Cl <sup>-</sup>                                           |
| Oxygen                        | O <sub>2</sub>                                            |
| Nitrate                       | NO <sub>3</sub> <sup>-</sup>                              |
| Sulfate                       | SO <sub>4</sub> <sup>2-</sup>                             |
| Methane                       | CH <sub>4</sub>                                           |
| Iron                          | Fe <sup>2+</sup>                                          |
| Ammonium <sup>c</sup>         | $\sum$ NH <sub>4</sub> <sup>+</sup>                       |
| Hydrogen sulfide <sup>c</sup> | $\sum$ H <sub>2</sub> S                                   |
| Phosphate <sup>c</sup>        | $\sum$ HPO <sub>4</sub> <sup>2-</sup>                     |
| Dissolved Inorganic Carbon    | DIC                                                       |
| Manganese                     | Mn <sup>2+</sup>                                          |

<sup>a</sup> chemical species consist of 3 types: reactive ( $\alpha$ ), less reactive ( $\beta$ ) and refractory ( $\gamma$ ). Fe oxide <sup>$\beta(pulse)$</sup>  and Fe oxide <sup>$\beta(max)$</sup>  are not specifically named because they have the same characteristics as Fe oxide <sup>$\beta$</sup> .

<sup>b</sup> chemical species consist of two types: reactive ( $\alpha$ ) and less reactive ( $\beta$ ).

<sup>c</sup>  $\sum$  denotes that all species of an acid are included.

**Table S.2.** Reaction pathways and stoichiometries implemented in the model.

| <b>Primary redox reactions</b>                                                                                                                                             |     |
|----------------------------------------------------------------------------------------------------------------------------------------------------------------------------|-----|
| $OM^{\alpha,\beta} + aO_2 \rightarrow aCO_2 + bNH_4^+ + cH_3PO_4 + aH_2O$                                                                                                  | R1  |
| $OM^{\alpha,\beta} + 0.8aNO_3^- + 0.8aH^+ \rightarrow aCO_2 + bNH_4^+ + cH_3PO_4 + 0.4aN_2 + 1.4aH_2O$                                                                     | R2  |
| $OM^{\alpha,\beta} + 2aMn(OH)_2^\alpha + 2aH^+ \rightarrow 2Mn^{2+} + aCO_2 + cH_3PO_4 + 2aH_2O$                                                                           | R3  |
| $OM^{\alpha,\beta} + 4aFe(OH)_3^\alpha + 4a\chi^\alpha Fe_{ox}P + 12aH^+ \rightarrow aCO_2 + bNH_4^+ + (c+4a\chi^\alpha)H_3PO_4 + 13aH_2O + 4aFe_2^+$                      | R4  |
| $OM^{\alpha,\beta} + 0.5aSO_4^{2-} + aH^+ \rightarrow aCO_2 + bNH_4^+ + cH_3PO_4 + 0.5aH_2S + aH_2O$                                                                       | R5  |
| $OM^{\alpha,\beta} \rightarrow 0.5aCO_2 + bNH_4^+ + cH_3PO_4 + 0.5aCH_4$                                                                                                   | R6  |
| $CO_2 + 4H_2 \rightarrow CH_4 + 2H_2O$                                                                                                                                     | R7  |
| <b>Secondary and other reactions</b>                                                                                                                                       |     |
| $2O_2 + NH_4^+ + 2HCO_3^- \rightarrow NO_3^- + 2CO_2 + 3H_2O$                                                                                                              | R8  |
| $O_2 + 4Fe^{2+} + 8HCO_3^- + 2H_2O + 4\chi^\alpha H_2PO_4^- \rightarrow 4Fe(OH)_3^\alpha + 4\chi^\alpha Fe_{ox}P + 8CO_2$                                                  | R9  |
| $2O_2 + FeS \rightarrow SO_4^{2-} + Fe^{2+}$                                                                                                                               | R10 |
| $7O_2 + 2FeS_2 + 2H_2O \rightarrow 4SO_4^{2-} + 2Fe^{2+} + 4H^+$                                                                                                           | R11 |
| $2O_2 + H_2S + 2HCO_3^- \rightarrow SO_4^{2-} + 2CO_2 + 2H_2O$                                                                                                             | R12 |
| $2O_2 + CH_4 \rightarrow CO_2 + 2H_2O$                                                                                                                                     | R13 |
| $2Fe(OH)_3^\alpha + 2\chi^\alpha Fe_{ox}P + H_2S + 4CO_2 \rightarrow 2Fe^{2+} + 2\chi^\alpha H_2PO_4^- + S^0 + 4HCO_3^- + 2H_2O$                                           | R14 |
| $2Fe(OH)_3^{\beta,\beta(max),\beta(pulse)} + 2\chi^\alpha Fe_{ox}P + H_2S + 4CO_2 \rightarrow 2Fe^{2+} + 2\chi^\alpha H_2PO_4^- + S^0 + 4HCO_3^- + 2H_2O$                  | R15 |
| $Fe^{2+} + H_2S \rightarrow FeS + 2H^+$                                                                                                                                    | R16 |
| $FeS + H_2S \rightarrow FeS_2 + H_2$                                                                                                                                       | R17 |
| $4S_0 + 4H_2O \rightarrow 3H_2S + SO_4^{2-} + 2H^+$                                                                                                                        | R18 |
| $FeS + S^0 \rightarrow FeS_2$                                                                                                                                              | R19 |
| $SO_4^{2-} + CH_4 + CO_2 \rightarrow 2HCO_3^- + H_2S$                                                                                                                      | R20 |
| $CH_4 + 8Fe(OH)_3^{\alpha,\beta,\beta(max),\beta(pulse)} + 8\chi^{\alpha,\beta} Fe_{ox}P + 15H^+ \rightarrow HCO_3^- + 8Fe^{2+} + 8\chi^{\alpha,\beta} H_2PO_4^- + 21H_2O$ | R21 |
| $Fe(OH)_3^\alpha + (\chi^\alpha - \chi^\beta)Fe_{ox}P \rightarrow Fe(OH)_3^\beta + (\chi^\alpha - \chi^\beta)H_2PO_4^-$                                                    | R22 |
| $Fe^{2+} + CO_3^{2-} \rightarrow FeCO_3$                                                                                                                                   | R23 |
| $Fe(PO_4)_2 + 3H_2S \rightarrow 2FeS + 2HPO_4^{2-} + 4H^+$                                                                                                                 | R24 |
| $Mn^{2+} + HCO_3^- + OH^- \rightarrow MnCO_3 + H_2O$                                                                                                                       | R25 |
| $2Mn^{2+} + 2O_2 + 4H^+ \rightarrow 2Mn(OH)_2^\alpha$                                                                                                                      | R26 |
| $Mn(OH)_2^{\alpha,\beta} + 2H_3PO_4 + 2Fe^{2+} \rightarrow Mn^{2+} + 2\chi^\alpha Fe_{ox}P$                                                                                | R27 |
| $Mn(OH)_2^\alpha + H_2S \rightarrow Mn^{2+} + S_0 + 2H_2O$                                                                                                                 | R28 |
| $Mn(OH)_2^\beta + H_2S \rightarrow Mn^{2+} + S_0 + 2H_2O$                                                                                                                  | R29 |
| $Mn(OH)_2^\alpha \rightarrow Mn(OH)_2^\beta$                                                                                                                               | R30 |
| $4Mn(OH)_2^{\alpha,\beta} + CH_4 + 7H^+ \rightarrow 4Mn^{2+} + HCO_3^- + 5H_2O$                                                                                            | R31 |
| $Fe(OH)_3^{\beta,\beta(pulse)} + (\chi^{\beta(max)} - \chi^{\beta(pulse)})HPO_4^{2-} \rightarrow Fe(OH)_3^{\beta(max)}$                                                    | R32 |

Organic matter is of the form  $((CH_2O)_a(NH_4^+)_b(H_3PO_4)_c)$ , where  $a=1$ ,  $b=1/16$  and  $c=300/1$ .  $\alpha$ ,  $\beta$ , &  $\gamma$  describe different fractions (i.e. highly reactive, less reactive and refractory).  $\chi^{\alpha,\beta,\gamma}$  describes the different P:Fe ratios of  $Fe(OH)_3^{\alpha,\beta,\gamma}$ . Reactions for different  $Fe(OH)_3^\beta$  fractions ( $\beta$ ,  $\beta(max)$  and  $\beta(pulse)$ ) are the same and are therefore combined as  $Fe(OH)_3^\beta$ .

**Table S.3.** Environmental parameters used in the model.

| Description                                              | Symbol                | Value or expression                   | unit                             | source |
|----------------------------------------------------------|-----------------------|---------------------------------------|----------------------------------|--------|
| Porosity at the Surface                                  | $\phi_0$              | 0.935                                 | vol vol <sup>-1</sup>            | a      |
| Porosity at depth                                        | $\phi_\infty$         | 0.87                                  | vol vol <sup>-1</sup>            | a      |
| Porosity e-folding distance                              | $\gamma$              | 35                                    | cm                               | b      |
| Sediment density                                         | $\rho$                | 2.65                                  | g cm <sup>-3</sup>               | c      |
| Temperature                                              | $T$                   | 2.77                                  | °C                               | a      |
| Salinity                                                 | $S$                   | 5.05                                  |                                  | a      |
| Advective velocity<br>of solids at depth                 | $v_\infty$            | $\frac{F_{sed}}{\rho(1-\phi_\infty)}$ |                                  | —      |
| Bioturbation coefficient at<br>sediment-water interface  | $D_b$                 | 1.76                                  | cm <sup>2</sup> yr <sup>-1</sup> | b      |
| Bioirrigation coefficient at<br>sediment-water interface | $\alpha$              | 45*10 <sup>4</sup>                    | yr <sup>-1</sup>                 | b      |
| Mixed layer depth                                        | $\zeta$               | 11                                    | cm                               | b      |
| C:N ratio of organic matter                              | C/N                   | 6.625                                 | mol mol <sup>-1</sup>            | d      |
| C:P ratio of organic matter                              | C/P                   | 300                                   | mol mol <sup>-1</sup>            | b      |
| P:Fe(OH) <sub>3</sub> <sup>α</sup>                       | $\chi^\alpha$         | 0.28                                  | mol mol <sup>-1</sup>            | b      |
| P:Fe(OH) <sub>3</sub> <sup>β</sup>                       | $\chi^\beta$          | 0.23                                  | mol mol <sup>-1</sup>            | b      |
| P:Fe(OH) <sub>3</sub> <sup>γ</sup>                       | $\chi^\gamma$         | 0.11                                  | mol mol <sup>-1</sup>            | b      |
| P:Fe(OH) <sub>3</sub> <sup>β(max)</sup>                  | $\chi^{\beta(max)}$   | 0.28                                  | mol mol <sup>-1</sup>            | b      |
| P:Fe(OH) <sub>3</sub> <sup>β(pulse)</sup>                | $\chi^{\beta(pulse)}$ | 0                                     | mol mol <sup>-1</sup>            | b      |

Sources: (a) Measured; (b) Model constrained; (c) Reed et al. (2011b); (d) Redfield (1958).

**Table S.4.** Boundary conditions of solids and solutes at the sediment-water interface in the model. Time dependent fluxes of OM<sup>α,β,γ</sup>, Fe(OH)<sub>3</sub><sup>α,β,γ</sup>, Mn(OH)<sub>2</sub><sup>α,β</sup>, Mn carbonates and sedimentation rate at the sediment-water interface are shown in figure 3. For all chemical species a zero-gradient boundary condition was specified at the bottom of the model domain.

| Solids                           | Flux at sediment<br>water interface | Unit                                 |
|----------------------------------|-------------------------------------|--------------------------------------|
| F FeS                            | 0                                   | mol m <sup>-2</sup> yr <sup>-1</sup> |
| F FeS <sub>2</sub>               | 0                                   | mol m <sup>-2</sup> yr <sup>-1</sup> |
| F S <sub>0</sub>                 | 0                                   | mol m <sup>-2</sup> yr <sup>-1</sup> |
| F FeCO <sub>3</sub>              | 0.27                                | mol m <sup>-2</sup> yr <sup>-1</sup> |
| F Vivianite                      | 0                                   | mol m <sup>-2</sup> yr <sup>-1</sup> |
| F Detr. P                        | 0.034                               | mol m <sup>-2</sup> yr <sup>-1</sup> |
| F Auth. P                        | 0.03                                | mol m <sup>-2</sup> yr <sup>-1</sup> |
| Solutes                          | BW concentration                    | Unit                                 |
| C O <sub>2</sub>                 | 0.091                               | mol m <sup>-3</sup>                  |
| C NO <sub>3</sub> <sup>-</sup>   | 0                                   | mol m <sup>-3</sup>                  |
| C SO <sub>4</sub> <sup>2-</sup>  | 4.05                                | mol m <sup>-3</sup>                  |
| C Fe <sup>2+</sup>               | 0                                   | mol m <sup>-3</sup>                  |
| C Mn <sup>2+</sup>               | 0                                   | mol m <sup>-3</sup>                  |
| C H <sub>2</sub> S               | 0                                   | mol m <sup>-3</sup>                  |
| C NH <sub>4</sub> <sup>+</sup>   | 0                                   | mol m <sup>-3</sup>                  |
| C HPO <sub>4</sub> <sup>2-</sup> | 0.21                                | mol m <sup>-3</sup>                  |
| C DIC                            | 1.5                                 | mol m <sup>-3</sup>                  |

**Table S.5.** Analyses of vivianite crystals from below the SMTZ at site NB8 with electron microprobe-EDS. Vivianite crystals were collected from 3 different depths. The average value and standard deviation for each element was calculated from 7 EDS point analyses.

| <b>Element</b> | <b>mol %</b>                |
|----------------|-----------------------------|
| O              | 37.8 ± 3.4                  |
| Na             | 0.4 ± 0.2                   |
| Mg             | 0.8 ± 0.6                   |
| Al             | 6.3 ± 6.2                   |
| Si             | 2.6 ± 1.5                   |
| P              | 13.5 ± 5.4                  |
| Ca             | 0.3 ± 0.2                   |
| Mn             | 6.9 ± 2.3                   |
| Fe             | 31.4 ± 6.3                  |
|                | <b>mol mol<sup>-1</sup></b> |
| Fe/P           | 3.3 ± 2.0                   |
| Fe/Mn          | 4.7 ± 0.8                   |
| (Fe+Mn)/P      | 4.1 ± 2.5                   |
| Mn/P           | 0.8 ± 0.5                   |
| (Fe+Mn+Mg)/P   | 4.3 ± 2.5                   |

**Table S.6.** Reaction equations implemented in the model.

| <b>Primary redox reaction equations</b>                                                                                                                                                                                                                                                                                                                           |     |
|-------------------------------------------------------------------------------------------------------------------------------------------------------------------------------------------------------------------------------------------------------------------------------------------------------------------------------------------------------------------|-----|
| $R1 = k_{\alpha,\beta} OM^{\alpha,\beta} \left( \frac{[O_2]}{K_{m,O_2} + [O_2]} \right)$                                                                                                                                                                                                                                                                          | E1  |
| $R2 = k_{\alpha,\beta} OM^{\alpha,\beta} \left( \frac{[NO_3^-]}{K_{m,NO_3^-} + [NO_3^-]} \right) \left( \frac{K_{m,O_2}}{K_{m,O_2} + [O_2]} \right)$                                                                                                                                                                                                              | E2  |
| $R3 = k_{\alpha,\beta} OM^{\alpha,\beta} \left( \frac{[Mn(OH)_2]}{K_{m,Mn(OH)_2} + [Mn(OH)_2]} \right) \left( \frac{K_{m,NO_3^-}}{K_{m,NO_3^-} + [NO_3^-]} \right) \left( \frac{K_{m,O_2}}{K_{m,O_2} + [O_2]} \right)$                                                                                                                                            | E3  |
| $R4 = k_{\alpha,\beta} OM^{\alpha,\beta} \left( \frac{[Fe(OH)_3]}{K_{m,Fe(OH)_3} + [Fe(OH)_3]} \right) \left( \frac{K_{m,Mn(OH)_2}}{K_{m,Mn(OH)_2} + [Mn(OH)_2]} \right) \left( \frac{K_{m,NO_3^-}}{K_{m,NO_3^-} + [NO_3^-]} \right) \left( \frac{K_{m,O_2}}{K_{m,O_2} + [O_2]} \right)$                                                                          | E4  |
| $R5 = k_{\alpha,\beta} OM^{\alpha,\beta} \left( \frac{[SO_4^{2-}]}{K_{m,SO_4^{2-}} + [SO_4^{2-}]} \right) \left( \frac{K_{m,Fe(OH)_3}}{K_{m,Fe(OH)_3} + [Fe(OH)_3]} \right) \left( \frac{K_{m,Mn(OH)_2}}{K_{m,Mn(OH)_2} + [Mn(OH)_2]} \right) \left( \frac{K_{m,NO_3^-}}{K_{m,NO_3^-} + [NO_3^-]} \right) \left( \frac{K_{m,O_2}}{K_{m,O_2} + [O_2]} \right)$     | E5  |
| $R6 = k_{\alpha,\beta} OM^{\alpha,\beta} \left( \frac{K_{m,SO_4^{2-}}}{K_{m,SO_4^{2-}} + [SO_4^{2-}]} \right) \left( \frac{K_{m,Fe(OH)_3}}{K_{m,Fe(OH)_3} + [Fe(OH)_3]} \right) \left( \frac{K_{m,Mn(OH)_2}}{K_{m,Mn(OH)_2} + [Mn(OH)_2]} \right) \left( \frac{K_{m,NO_3^-}}{K_{m,NO_3^-} + [NO_3^-]} \right) \left( \frac{K_{m,O_2}}{K_{m,O_2} + [O_2]} \right)$ | E6  |
| $R7 = k_1 DIC \left( \frac{K_{m,SO_4^{2-}}}{K_{m,SO_4^{2-}} + [SO_4^{2-}]} \right) \left( \frac{K_{m,Fe(OH)_3}}{K_{m,Fe(OH)_3} + [Fe(OH)_3]} \right) \left( \frac{K_{m,Mn(OH)_2}}{K_{m,Mn(OH)_2} + [Mn(OH)_2]} \right) \left( \frac{K_{m,NO_3^-}}{K_{m,NO_3^-} + [NO_3^-]} \right) \left( \frac{K_{m,O_2}}{K_{m,O_2} + [O_2]} \right)$                            | E7  |
| <b>Secondary redox and other reaction equations</b>                                                                                                                                                                                                                                                                                                               |     |
| $R8 = k_2 [O_2] [NH_4^+]$                                                                                                                                                                                                                                                                                                                                         | E8  |
| $R9 = k_3 [O_2] [Fe^{2+}]$                                                                                                                                                                                                                                                                                                                                        | E9  |
| $R10 = k_4 [O_2] [FeS]$                                                                                                                                                                                                                                                                                                                                           | E10 |
| $R11 = k_5 [O_2] [FeS_2]$                                                                                                                                                                                                                                                                                                                                         | E11 |
| $R12 = k_6 [O_2] [\sum H_2S]$                                                                                                                                                                                                                                                                                                                                     | E12 |
| $R13 = k_7 [O_2] [CH_4]$                                                                                                                                                                                                                                                                                                                                          | E13 |
| $R14 = k_8 [Fe(OH)_3^{\alpha}] [\sum H_2S]$                                                                                                                                                                                                                                                                                                                       | E14 |
| $R15 = k_9 [Fe(OH)_3^{\beta, \beta(max), \beta(pulse)}] [\sum H_2S]$                                                                                                                                                                                                                                                                                              | E15 |
| $R16 = k_{10} [Fe^{2+}] [\sum H_2S]$                                                                                                                                                                                                                                                                                                                              | E16 |
| $R17 = k_{11} [FeS] [\sum H_2S]$                                                                                                                                                                                                                                                                                                                                  | E17 |
| $R18 = k_{12} [S^0]$                                                                                                                                                                                                                                                                                                                                              | E18 |
| $R19 = k_{13} [Fe^{2+}] [S^0]$                                                                                                                                                                                                                                                                                                                                    | E19 |
| $R20 = k_{14} [SO_4^{2-}] [CH_4]$                                                                                                                                                                                                                                                                                                                                 | E20 |
| $R21 = k_{15} [Fe(OH)_3^{\alpha, \beta, \beta(max), \beta(pulse)}] [CH_4]$                                                                                                                                                                                                                                                                                        | E21 |
| $R22 = k_{16} [Fe(OH)_3^{\alpha}]$                                                                                                                                                                                                                                                                                                                                | E22 |
| $R23 = k_{17} [Fe^{2+}] [HCO_3^-]$                                                                                                                                                                                                                                                                                                                                | E23 |
| $R24 = k_{18} [Fe_3(HPO_4^{2-})_2] [\sum H_2S]$                                                                                                                                                                                                                                                                                                                   | E24 |
| $R25 = k_{19} [Mn^{2+}] [HCO_3^-]$                                                                                                                                                                                                                                                                                                                                | E25 |
| $R26 = k_{20} [Mn^{2+}] [O_2]$                                                                                                                                                                                                                                                                                                                                    | E26 |
| $R27 = k_{21} [Mn(OH)_2^{\alpha, \beta}] [HPO_4^{2-}] [Fe^{2+}]$                                                                                                                                                                                                                                                                                                  | E27 |
| $R28 = k_{22} [Mn(OH)_2^{\alpha}] [\sum H_2S]$                                                                                                                                                                                                                                                                                                                    | E28 |
| $R29 = k_{23} [Mn(OH)_2^{\beta}] [\sum H_2S]$                                                                                                                                                                                                                                                                                                                     | E29 |
| $R30 = k_{24} [Mn(OH)_2^{\alpha}]$                                                                                                                                                                                                                                                                                                                                | E30 |
| $R31 = k_{25} [Mn(OH)_2^{\alpha, \beta}] [CH_4]$                                                                                                                                                                                                                                                                                                                  | E31 |
| $R32 = k_{26} [Fe(OH)_3^{\beta, \beta(max), \beta(pulse)}] [HPO_4^{2-}]$                                                                                                                                                                                                                                                                                          | E32 |

**Table S.7.** Reaction parameters used in the model.

| Parameter                                 | Value             | Unit                    | Source | Values in literature         |
|-------------------------------------------|-------------------|-------------------------|--------|------------------------------|
| $k_{\alpha}$                              | 0.3               | $\text{yr}^{-1}$        | a,b    | 0.05-1.62                    |
| $k_{\beta}$                               | 0.0086            | $\text{yr}^{-1}$        | b,h    | 0.0025-0.0086                |
| $K_{O_2}$                                 | 20                | $\mu\text{m L}^{-1}$    | c      | 1-30                         |
| $K_{NO_3^-}$                              | 4                 | $\mu\text{m L}^{-1}$    | c      | 4-80                         |
| $K_{Mn(OH)_2}$                            | 4                 | $\mu\text{m g}^{-1}$    | c      | 4-32                         |
| $K_{Fe(OH)_3}$                            | 65                | $\mu\text{m g}^{-1}$    | c      | 65-100                       |
| $K_{SO_4^{2-}}$                           | 1.6               | $\mu\text{m L}^{-1}$    | c      | 1.6                          |
| k1 (E7)                                   | 0.044             | $\text{yr}^{-1}$        | i      | 0.0011                       |
| k2 (E8)                                   | 10000             | $\text{mmol yr}^{-1}$   | c,d    | 5000-39000                   |
| k3 (E9)                                   | $1.4 \cdot 10^5$  | $\text{mmol yr}^{-1}$   | c      | $1.4 \cdot 10^5$             |
| k4 (E10)                                  | 300               | $\text{mmol yr}^{-1}$   | c      | 300                          |
| k5 (E11)                                  | 1                 | $\text{mmol yr}^{-1}$   | c      | 1                            |
| k6 (E12)                                  | 160               | $\text{mmol yr}^{-1}$   | c      | 160                          |
| k7 (E13)                                  | $10^7$            | $\text{mmol yr}^{-1}$   | c      | $10^7$                       |
| k8 (E14)                                  | 55                | $\text{mmol yr}^{-1}$   | c,g,i  | 8-100                        |
| k9 (E15)                                  | 44                | $\text{mmol yr}^{-1}$   | c,j    | 0.004-100                    |
| k10 (E16)                                 | 9000              | $\text{mmol yr}^{-1}$   | b,d    | 100-14800                    |
| k11 (E17)                                 | $10^{-15}$        | $\text{mmol yr}^{-1}$   | e,i    | 0.0003-3.15                  |
| k12 (E18)                                 | 3                 | $\text{yr}^{-1}$        | f      | 3                            |
| k13 (E19)                                 | 0.0025            | $\text{mmol yr}^{-1}$   | f,g    | 0.001-7                      |
| k14 (E20)                                 | 17                | $\text{mmol yr}^{-1}$   | c,g    | 10(c)-120(g)                 |
| k15 (E21)                                 | 0.0021            | $\text{mmol yr}^{-1}$   | g,i    | $1.6 \cdot 10^{-7}$ - 0.0074 |
| k17 (E23)                                 | 0                 | $\text{mmol yr}^{-1}$   | i      | 0.0027                       |
| k18 (E24)                                 | $8 \cdot 10^{-4}$ | $\text{mmol yr}^{-1}$   | i      | $8 \cdot 10^{-4}$            |
| k19 (E25)                                 | 0.265             | $\text{mmol yr}^{-1}$   |        | Model constrained            |
| k20 (E26)                                 | 1200              | $\text{mmol yr}^{-1}$   | c      | 800-20.000                   |
| k21 (E27)                                 | 0.002             | $\text{mmol yr}^{-1}$   | f      | 2                            |
| k22 (E28)                                 | 0.5               | $\text{mmol yr}^{-1}$   | c      | <100.000 (20)                |
| k23 (E29)                                 | 0.4               | $\text{mmol yr}^{-1}$   | c      | <100.000 (20)                |
| k24 (E30)                                 | 1.8               | $\text{yr}^{-1}$        | f      | 1.8                          |
| k25 (E31)                                 | 0.0017            | $\text{mmol yr}^{-1}$   |        | Model constrained            |
| k26 (E32)                                 | 3                 | $\text{mmol yr}^{-1}$   |        | Model constrained            |
| Vmax                                      | $10^{-6}$         | $\text{yr}^{-1}$        |        | Model constrained            |
| half saturation conc. $\text{Fe}^{2+}$    | 1000              | $\mu\text{mol yr}^{-1}$ |        | Model constrained            |
| half saturation conc. $\text{HPO}_4^{2-}$ | 1000              | $\mu\text{mol yr}^{-1}$ |        | Model constrained            |

Sources: <sup>a</sup>(Moodley et al., 2005); <sup>b</sup>(Reed et al., 2011b); <sup>c</sup>(Wang and Van Cappellen, 1996); <sup>d</sup>(Reed et al., 2011a); <sup>e</sup>(Rickard and Luther, 1997); <sup>f</sup>(Berg et al., 2003); <sup>g</sup>(Rooze et al., 2016); <sup>h</sup>(Reed et al., 2016); <sup>i</sup>(Egger et al., 2016a); <sup>j</sup>(Egger et al., 2016b);

## References

- Berg, P., Rysgaard, S., and Thamdrup, B.: Dynamic modeling of early diagenesis and nutrient cycling. A case study in an Arctic marine sediment, *American Journal of Science*, 303, 905–955, <https://doi.org/10.2475/ajs.303.10.905>, 2003.
- Boudreau, B. P.: A method-of-lines code for carbon and nutrient diagenesis in aquatic sediments, *Computers and Geosciences*, 22, 479–496, [https://doi.org/10.1016/0098-3004\(95\)00115-8](https://doi.org/10.1016/0098-3004(95)00115-8), 1996a.
- 5 Boudreau, B. P.: The diffusive tortuosity of fine-grained unlithified sediments, [https://doi.org/10.1016/0016-7037\(96\)00158-5](https://doi.org/10.1016/0016-7037(96)00158-5), 1996b.
- Boudreau, B. P.: Diagenetic models and their implementation. *Modelling transport and reactions in aquatic sediments*, vol. 171, <https://doi.org/10.1007/978-3-642-60421-5>, 1997.
- Egger, M., Kraal, P., Jilbert, T., Sulu-Gambari, F., Sapart, C. J., Röckmann, T., and Slomp, C. P.: Anaerobic oxidation of methane alters sediment records of sulfur, iron and phosphorus in the Black Sea, *Biogeosciences*, 13, 5333–5355, <https://doi.org/10.5194/bg-13-5333-2016>, 2016a.
- 10 Egger, M., Lenstra, W., Jong, D., Meysman, F. J., Sapart, C. J., Van Der Veen, C., Röckmann, T., Gonzalez, S., and Slomp, C. P.: Rapid sediment accumulation results in high methane effluxes from coastal sediments, *PLoS ONE*, 11, <https://doi.org/10.1371/journal.pone.0161609>, 2016b.
- 15 Froelich, P. N., Klinkhammer, G. P., Bender, M. L., Luedtke, N. A., Heath, G. R., Cullen, D., Dauphin, P., Hammond, D., Hartman, B., and Maynard, V.: Early oxidation of organic matter in pelagic sediments of the eastern equatorial Atlantic: suboxic diagenesis, *Geochimica et Cosmochimica Acta*, 43, 1075–1090, [https://doi.org/10.1016/0016-7037\(79\)90095-4](https://doi.org/10.1016/0016-7037(79)90095-4), 1979.
- Meysman, F. J. R., Boudreau, B. P., and Middelburg, J. J.: Modeling reactive transport in sediments subject to bioturbation and compaction, *Geochimica et Cosmochimica Acta*, 69, 3601–3617, <https://doi.org/10.1016/j.gca.2005.01.004>, 2005.
- 20 Moodley, L., Middelburg, J. J., Herman, P. M. J., Soetaert, K., and de Lange, G. J.: Oxygenation and organic-matter preservation in marine sediments: Direct experimental evidence from ancient organic carbon-rich deposits, *Geology*, 33, 889–892, <https://doi.org/10.1130/G21731.1>, 2005.
- Petzold, L.: Automatic selection of methods for solving stiff and nonstiff systems of ordinary differential equations, *SIAM J Sci and Stat Comput*, 4, 136–148, <https://doi.org/10.1137/0904010>, 1983.
- 25 Redfield, A. C.: The Biological Control of Chemical Factors in the Environment, *American Scientist*, 46, 205–221, <https://doi.org/10.2307/27828530>, <http://www.jstor.org/stable/27827150>, 1958.
- Reed, D. C., Slomp, C. P., and de Lange, G. J.: A quantitative reconstruction of organic matter and nutrient diagenesis in Mediterranean Sea sediments over the Holocene, *Geochimica et Cosmochimica Acta*, 75, 5540–5558, <https://doi.org/10.1016/j.gca.2011.07.002>, <http://dx.doi.org/10.1016/j.gca.2011.07.002>, 2011a.
- 30 Reed, D. C., Slomp, C. P., and Gustafsson, B. G.: Sedimentary phosphorus dynamics and the evolution of bottom-water hypoxia: A coupled benthic-pelagic model of a coastal system, *Limnology and Oceanography*, 56, 1075–1092, <https://doi.org/10.4319/lo.2011.56.3.1075>, 2011b.
- Reed, D. C., Gustafsson, B. G., and Slomp, C. P.: Shelf-to-basin iron shuttling enhances vivianite formation in deep Baltic Sea sediments, *Earth and Planetary Science Letters*, 434, 241–251, <https://doi.org/10.1016/j.epsl.2015.11.033>, <http://dx.doi.org/10.1016/j.epsl.2015.11.033>, 2016.
- 35 Rickard, D. and Luther, G. W.: Kinetics of pyrite formation by the H<sub>2</sub>S oxidation of iron (II) monosulfide in aqueous solutions between 25 and 125°C: The mechanism, *Geochimica et Cosmochimica Acta*, 61, 135–147, [https://doi.org/10.1016/S0016-7037\(96\)00322-5](https://doi.org/10.1016/S0016-7037(96)00322-5), 1997.
- Rooze, J., Egger, M., Tsandev, I., and Slomp, C. P.: Iron-dependent anaerobic oxidation of methane in coastal surface sediments: Potential controls and impact, *Limnology and Oceanography*, <https://doi.org/10.1002/lno.10275>, 2016.
- 40 Soetaert, K. and Meysman, F.: Reactive transport in aquatic ecosystems: Rapid model prototyping in the open source software R, *Environmental Modelling and Software*, 32, 49–60, <https://doi.org/10.1016/j.envsoft.2011.08.011>, <http://dx.doi.org/10.1016/j.envsoft.2011.08.011>, 2012.
- Soetaert, K., Petzoldt, T., and Meysman, F. J. R.: Marelac: Tools for Aquatic Sciences v2.1.3, R package, 2010.
- Wang, Y. F. and Van Cappellen, P.: A multicomponent reactive transport model of early diagenesis: Application to redox cycling in coastal marine sediments, *Geochimica Et Cosmochimica Acta*, 60, 2993–3014, [https://doi.org/10.1016/0016-7037\(96\)00140-8](https://doi.org/10.1016/0016-7037(96)00140-8), 1996.
- 45
